# Supplementary material for: Prdx1 inhibits tumorigenesis via regulating PTEN/AKT activity
Source: PubMed Central journal article supplement — EMBO J. 2009 Apr 16;28(10):1505–17. doi: 10.1038/emboj.2009.101 (PMC2688529; doi:10.1038/emboj.2009.101), 2009-04-16
Supplement: emboj2009101s1.pdf [file emboj2009101s1.pdf]

A

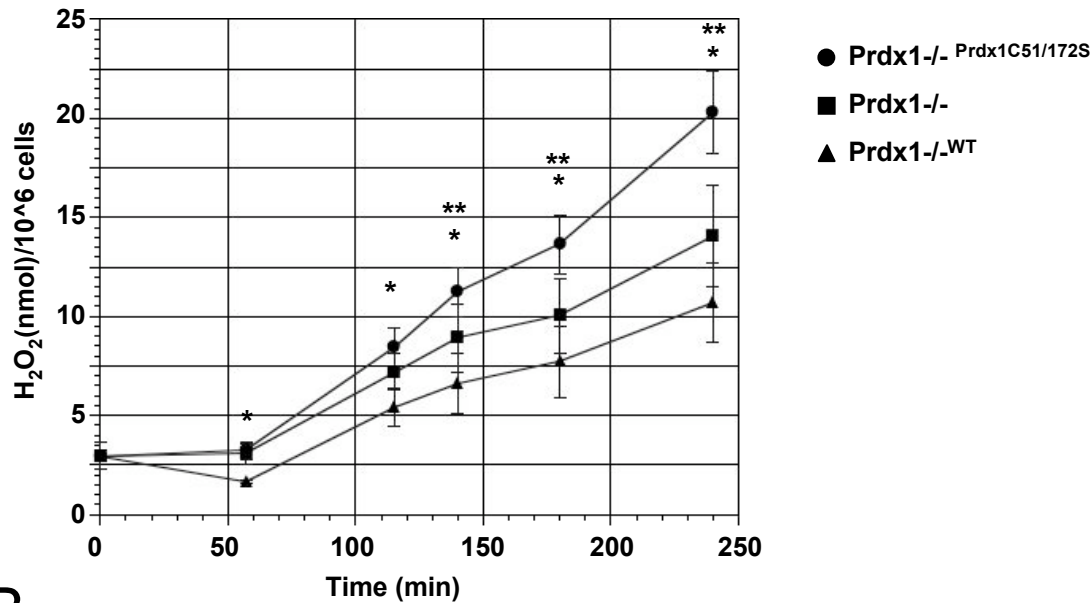

B

H<sub>2</sub>O<sub>2</sub> release of Prdx1<sup>-/-</sup>MEFs (filled square), Prdx1<sup>-/-</sup>MEFs reconstituted with the *Prdx1* wild-type gene (*Prdx1*<sup>WT</sup>) (filled triangle) and Prdx1<sup>-/-</sup>MEFs expressing Prdx1<sup>C51/172S</sup> (filled circle) were measured as described in detail in Materials and methods, by using Amplex Red reagent, which via oxidation, becomes fluorescent resorufin. The y-Axis presents H<sub>2</sub>O<sub>2</sub> release accumulated over time per 1x10<sup>6</sup> cells. For each clone, 6 wells were plated and analyzed. The experiment shown here is representative of 5 independent studies from 3 different sets of MEF clones from Prdx1-littermates. P values were calculated using an unpaired Student's t-Test. \*P<0.05. P-values for Prdx1<sup>-/-</sup>MEFs compared with Prdx1<sup>-/-</sup>Prdx1<sup>Cys51/172S</sup>: \*\*P<0.008;

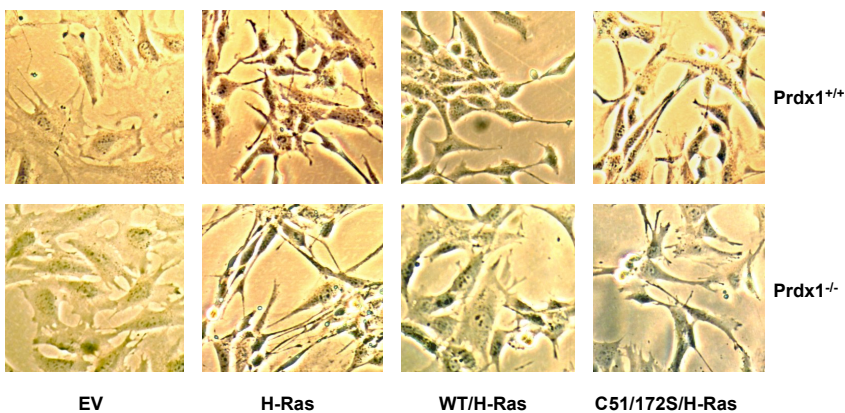

MEFs used in (B) were analyzed for morphological changes induced by *Prdx1*<sup>WT</sup>, *Prdx1*<sup>C51/172S</sup>, and *H-Ras* by using a Nikon Eclipse TE2000-S microscope. Images were captured with Micropublisher 3-3RTV.

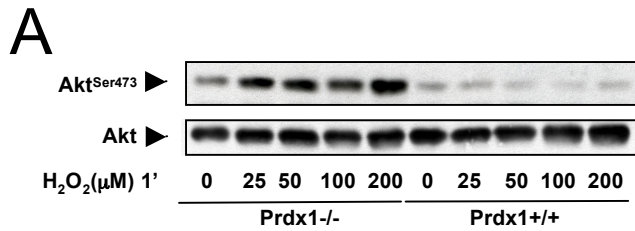

Prdx1<sup>-/-</sup>MEFs and Prdx1<sup>+/+</sup>MEFs were serum-starved for 48 hours and stimulated for 1 minute with H<sub>2</sub>O<sub>2</sub> at the indicated concentrations. Protein lysates were collected under argonized conditions by scraping cells into degassed lysis buffer (Material and methods) and analyzed under non-reducing conditions on SDS-PAGE. Akt phosphorylation was detected on Ser473. Akt protein as loading control

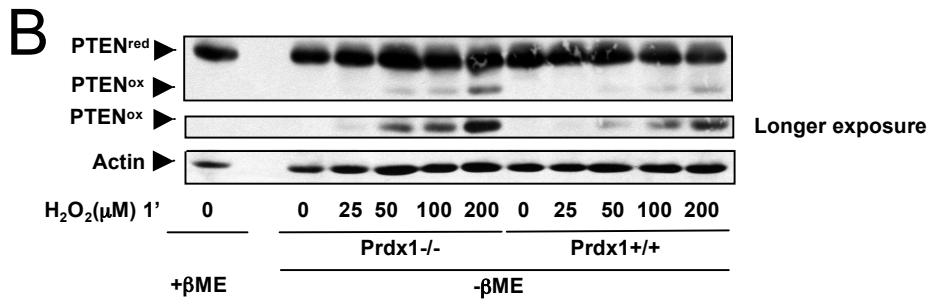

Prdx1<sup>-/-</sup>MEFs and Prdx1<sup>+/+</sup>MEFs protein lysates were treated as described under (A) and analyzed for oxidized PTEN proteins.

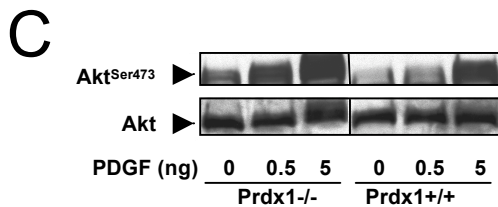

Prdx1<sup>-/-</sup>MEFs and Prdx1<sup>+/+</sup>MEFs were serum-starved for 48 hours and stimulated 1 minute with different PDGF concentrations as indicated. Protein lysates were collected and analyzed as described under (A).

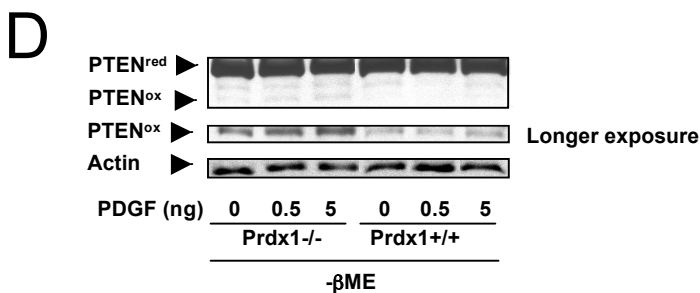

Prdx1<sup>-/-</sup>MEFs and Prdx1<sup>+/+</sup>MEFs protein lysates were treated as described under (G) and analyzed for oxidized PTEN proteins. Actin as loading control.

E

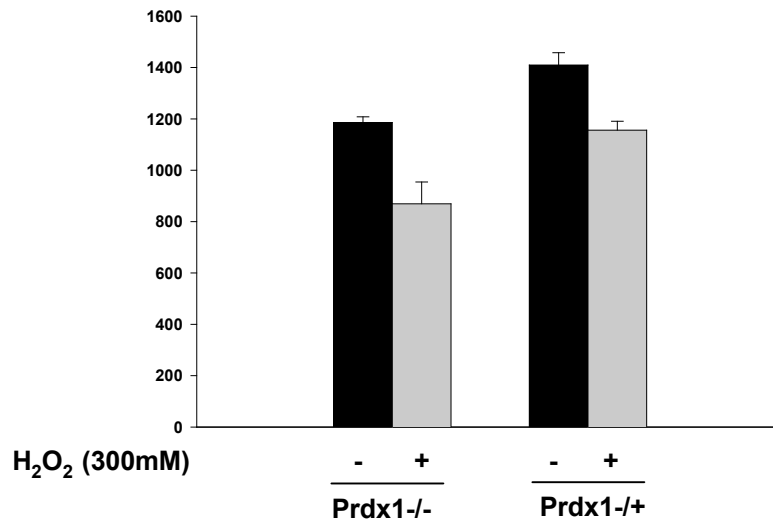

Endogenous PP2A activity is higher in Prdx1<sup>+/+</sup> MEFs compared to Prdx1<sup>-/-</sup> MEFs. Cells were starved for 48 h in DMEM with 0.25% FBS and then treated with 300  $\mu$ M H<sub>2</sub>O<sub>2</sub> for 30 min. The cell lysates were used for IP-PP2A phosphatase assay. The results are presented as mean of released phosphate levels from three independent experiments with SD as indicated.

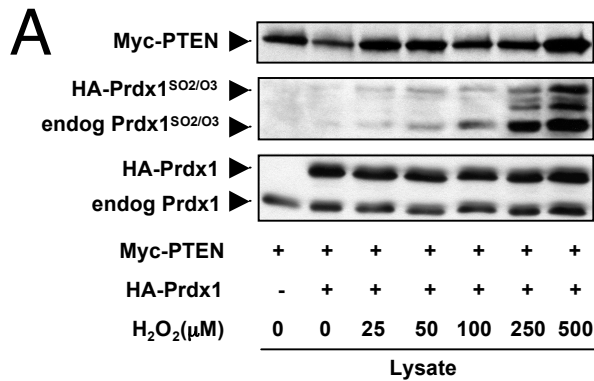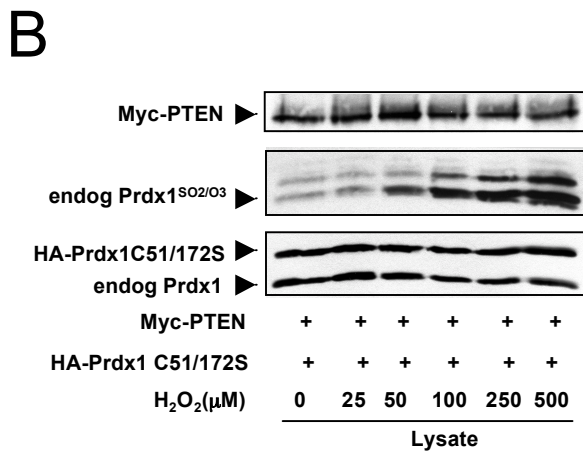

Part of the protein lysates from Figure 3B and C were collected immediately and analyzed by Western blotting as in parallel to the IPs. Proteins were detected through staining of membranes with anti-PTEN, anti-Prdx1-SO<sub>2</sub>/-SO<sub>3</sub> and anti-Prdx1 antibodies. Epitope-tagged Prdx1 migrates slower electrophoretically than endogenous Prdx1, labeled as HA-Prdx1. Epitope-tagged PTEN is labeled as Myc-PTEN. Anti- Prdx1-SO<sub>2</sub>/-SO<sub>3</sub> can cross-react with Prdx2-4 and does not bind Prdx1<sup>C51/172S</sup>.

C

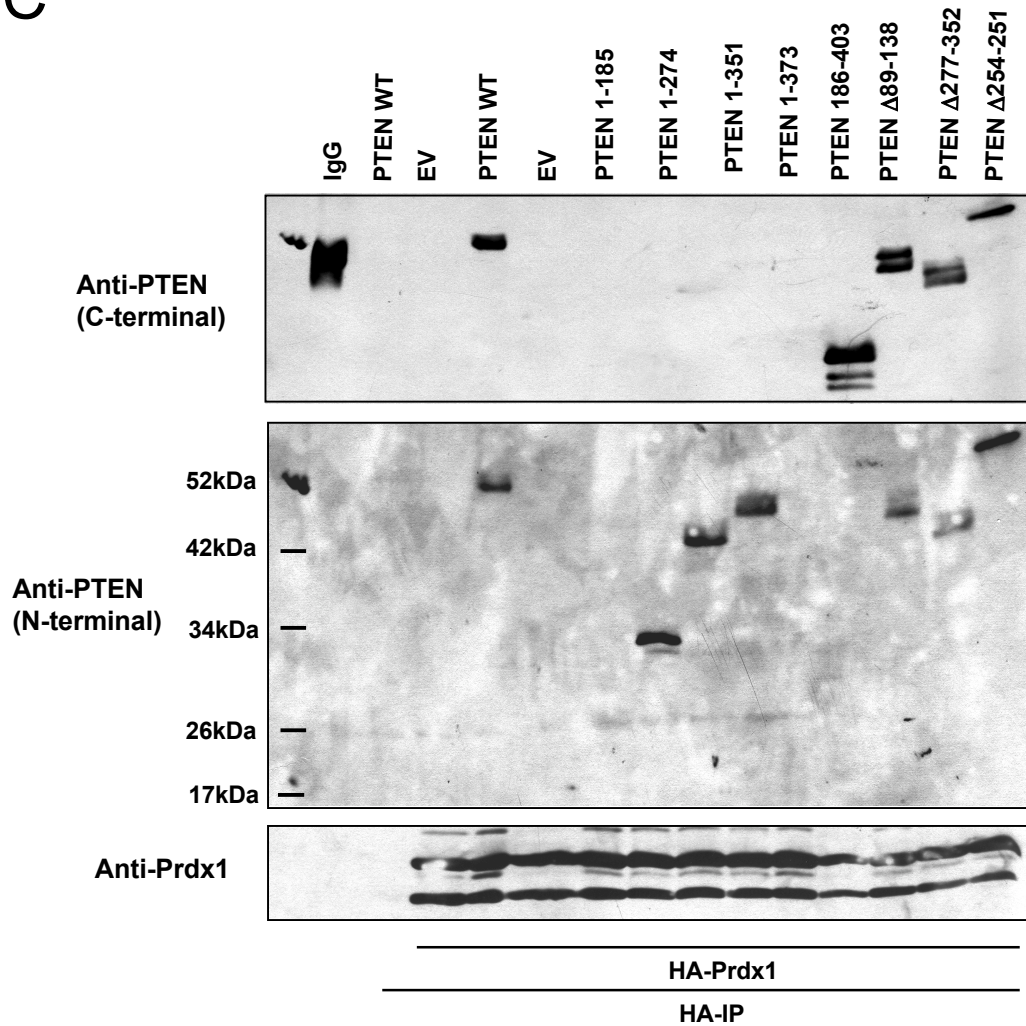

Epitope-tagged Myc-PTEN deletion mutants were co-expressed with epitope-tagged Prdx1 in 293T cells. Cell lysates were prepared under anaerobic conditions, and precipitated overnight using HA-conjugated agarose beads (Roche). IPs were washed four times with degassed lysis buffer and analyzed by Western blotting. Proteins were detected through staining of membranes with Anti-PTEN antibodies recognizing either PTEN N-terminus (Santa Cruz) or C-Terminus (Cell Signaling), respectively.

D

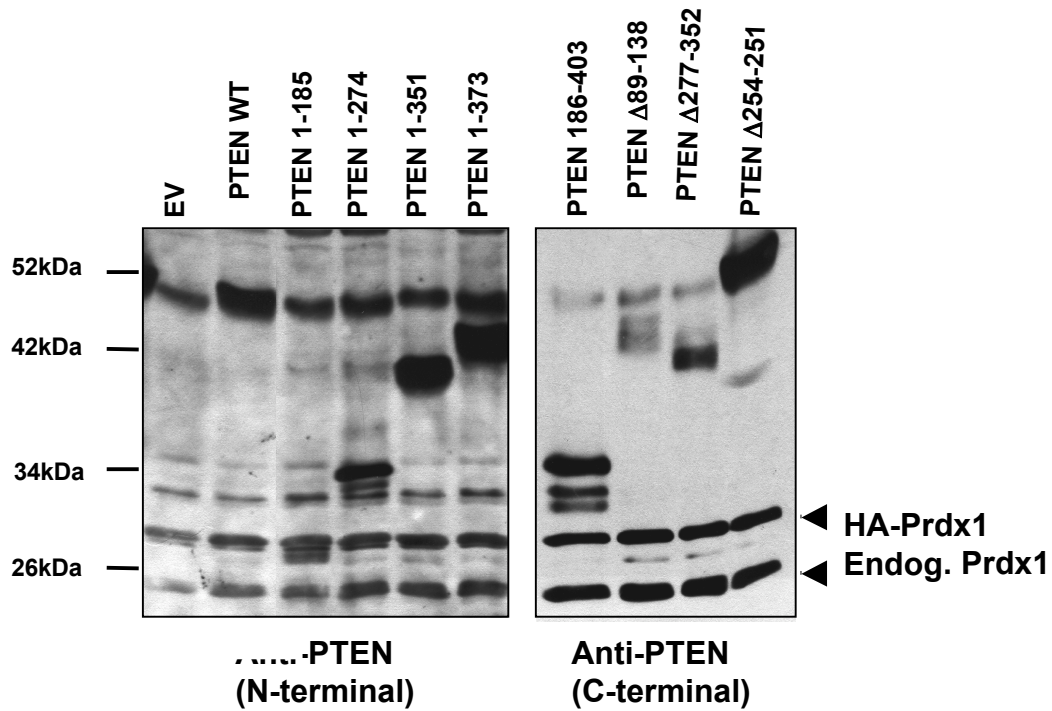

Protein samples of epitope-tagged Myc-PTEN mutants from (F) were analyzed by SDS-PAGE for expression of deletions mutants with Anti-PTEN antibodies recognizing either PTEN N-terminus (Santa Cruz) or C-Terminus (Cell Signaling), respectively; \*: PTEN 1-185.

E

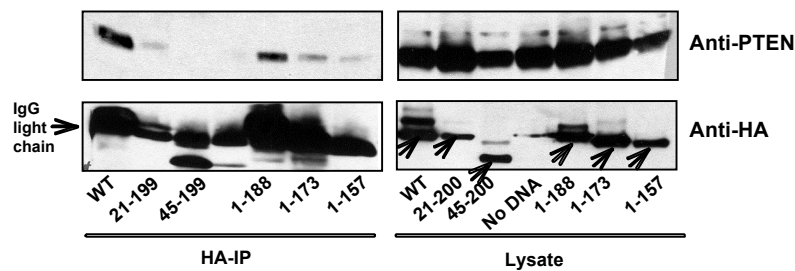

HA-Prdx1 truncation mutants are tested to pull down Myc-PTEN wild type protein. Epitope-tagged Myc-PTEN and HA-Prdx1 various N- and C-terminal truncation mutants were co-expressed in 293T cells. HA-Ips were processed as described under Figure 3A and B). Left side shows co-immunoprecipitations, right side shows expression of PTEN and Prdx1 wild type and mutants. Arrows indicate expression of Prdx1 wild type and truncation mutants in protein lysate.

**A**

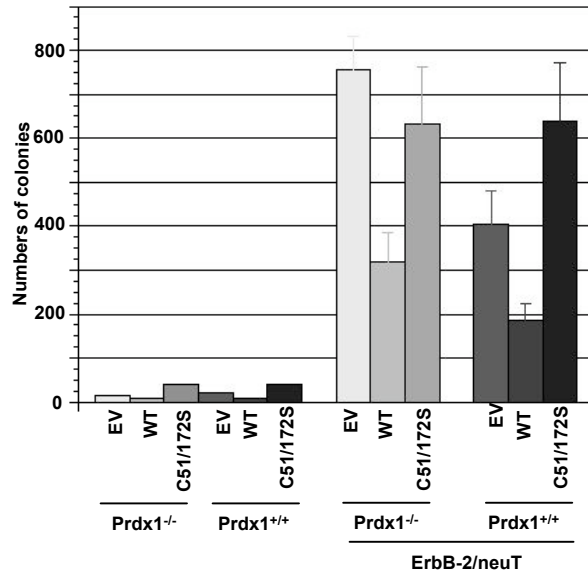

Prdx1<sup>-/-</sup>MEFs and Prdx1<sup>+/+</sup>MEFs were infected with retroviral constructs carrying genes for *Prdx1*<sup>WT</sup> or *Prdx1*<sup>C51/172S</sup> or pQXCIP expressing the puromycin gene only (empty vector=EV) and selected for 10 days in 2μg/ml puromycin. Before plating in soft agar, MEFs were infected with a retrovirus carrying ErbB-2/neu, selected in 5μg/ml puromycin for 4 days and seeded in soft agar and analyzed as described under (Figure 1C). Expression levels for ErbB-2 and Prdx1 proteins was assessed by Western blotting.

**B**

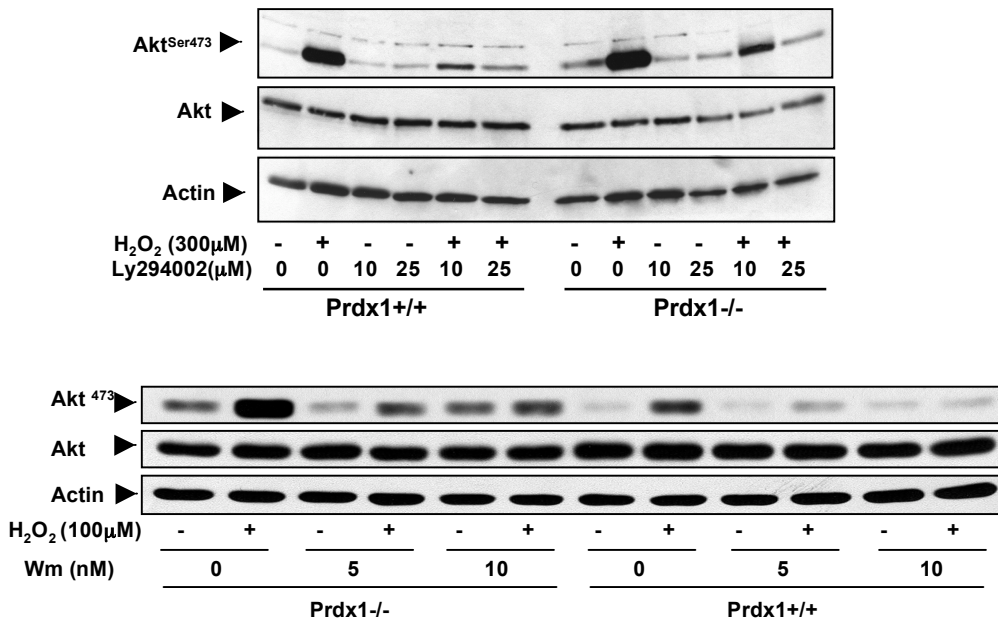

Prdx1<sup>-/-</sup>MEFs and Prdx1<sup>+/+</sup>MEFs were serum-starved for 48 hours and incubated with either H<sub>2</sub>O<sub>2</sub> for 20 minutes or Ly294002 (**B**, upper panel) or Wortmannin (**B**, lower panel) for one hour as indicated. Protein lysates were obtained anaerobically as described in Materials and methods and analyzed by SDS-PAGE.

## **Material and Methods Supplementary Figures:**

### **Measurement of PP2A Activity**

The activity of PP2A was measured with the PP2A immunoprecipitation phosphatase assay kit (Millipore, Bedford, MA).

Threonine phosphopeptide (K-R-Pt-I-R-R) was used as PP2A substrate. Briefly, after starvation (DMEM with 0.25% FBS) for 48 h, Prdx1<sup>-/-</sup> and Prdx1<sup>+/+</sup> MEFs were treated with 300  $\mu$ M H<sub>2</sub>O<sub>2</sub> for 30 min in serum free medium. The cells were lysed in phosphate free buffer (20 mM imidazole (pH 7.0), 2 mM EDTA, 2 mM EGTA, 1% Triton X-100 with 1 mM PMSF and 1  $\mu$ g/ml aprotinin). 500  $\mu$ g of the cell lysate was incubated with 4  $\mu$ g of anti-PP2A [C subunit, clone 1D6] and protein A agarose at 4°C for 2 h with constant rocking. The immunoprecipitates were then washed twice with Tris-buffered saline and once with Ser/Thr reaction buffer followed by the addition of diluted phosphopeptide (final concentration 750  $\mu$ M). The reactions were incubated for 10 min at 30°C with gentle shaking and 25  $\mu$ l of supernatants were used for PP2A activity. PP2A activities were determined by adding Malachite green phosphate detection solution and measuring the absorbance at 650 nm.
